# Supplementary material for: The Impact of A Gross Anatomy Course on Medical Students’ Emotional Reactions in Taiwan: The Role of High-Level Emotions
Source: Research Square preprint supplement (doi:10.21203/rs.3.rs-155704/v1), 2021-02-03
Supplement: Supplementary file 1 [file 0b32e362360e7b7ea5014067.docx]

**Supplement:**

**The English Version of the Emotional Reactions Towards Cadavers Scale**

Ruei-Jen Chiou a, Po-Fang Tsai b, and Der-Yan Hanc*

*a Department of Anatomy and Cell Biology, School of Medicine, College of Medicine, Taipei Medical University, Taipei, Taiwan. b Graduate Institute of Humanities in Medicine, College of Humanities and Social Sciences, Taipei Medical University, Taipei, Taiwan. cSection of Liberal Arts, Center for General Education, Taipei Medical University, Taipei, Taiwan.*

Full correspondence details for the *corresponding author: Der-Yan Han, [handeyan@tmu.edu.tw](mailto:handeyan@tmu.edu.tw), 250 Wu-Xing St., Xinyi District, Taipei 11031, Taiwan.

**English Version of the Emotional Reactions Towards Cadavers Scale**

Please choose from 1 (strongly disagree) to 7 (strongly agree) to indicate your level of agreement. How did you feel when you see cadavers in the Experiment of Gross Anatomy recently?

Strongly disagree Strongly agree

1. Nervous 1 2 3 4 5 6 7

2. Shocked 1 2 3 4 5 6 7

3. Low 1 2 3 4 5 6 7

4. Spooky 1 2 3 4 5 6 7

5. Respected 1 2 3 4 5 6 7

6. Terrified 1 2 3 4 5 6 7

7. Peaceful 1 2 3 4 5 6 7

8. Excited 1 2 3 4 5 6 7

9. Humble 1 2 3 4 5 6 7

10. Grief 1 2 3 4 5 6 7

11. Painful 1 2 3 4 5 6 7

12. Felt like escaping 1 2 3 4 5 6 7

13. Grateful 1 2 3 4 5 6 7

14. Fearful 1 2 3 4 5 6 7

15. Curious 1 2 3 4 5 6 7

16. Cherished 1 2 3 4 5 6 7

17. Happy 1 2 3 4 5 6 7

18. Admirable 1 2 3 4 5 6 7

19. Unlucky 1 2 3 4 5 6 7

20. Avoided as a taboo 1 2 3 4 5 6 7

21. Too sympathetic to bear 1 2 3 4 5 6 7

22. Fully expected 1 2 3 4 5 6 7

23. Familiar (with the silent mentor) 1 2 3 4 5 6 7

24. Doubtful (to the future processes
on a cadaver) 1 2 3 4 5 6 7

25. Disappointed (unable to achieve
other’s expectations) 1 2 3 4 5 6 7
